# Supplementary material
Source: ML conference proceedings conference paper supplement (https://aclanthology.org/2026.bionlp-2.23)

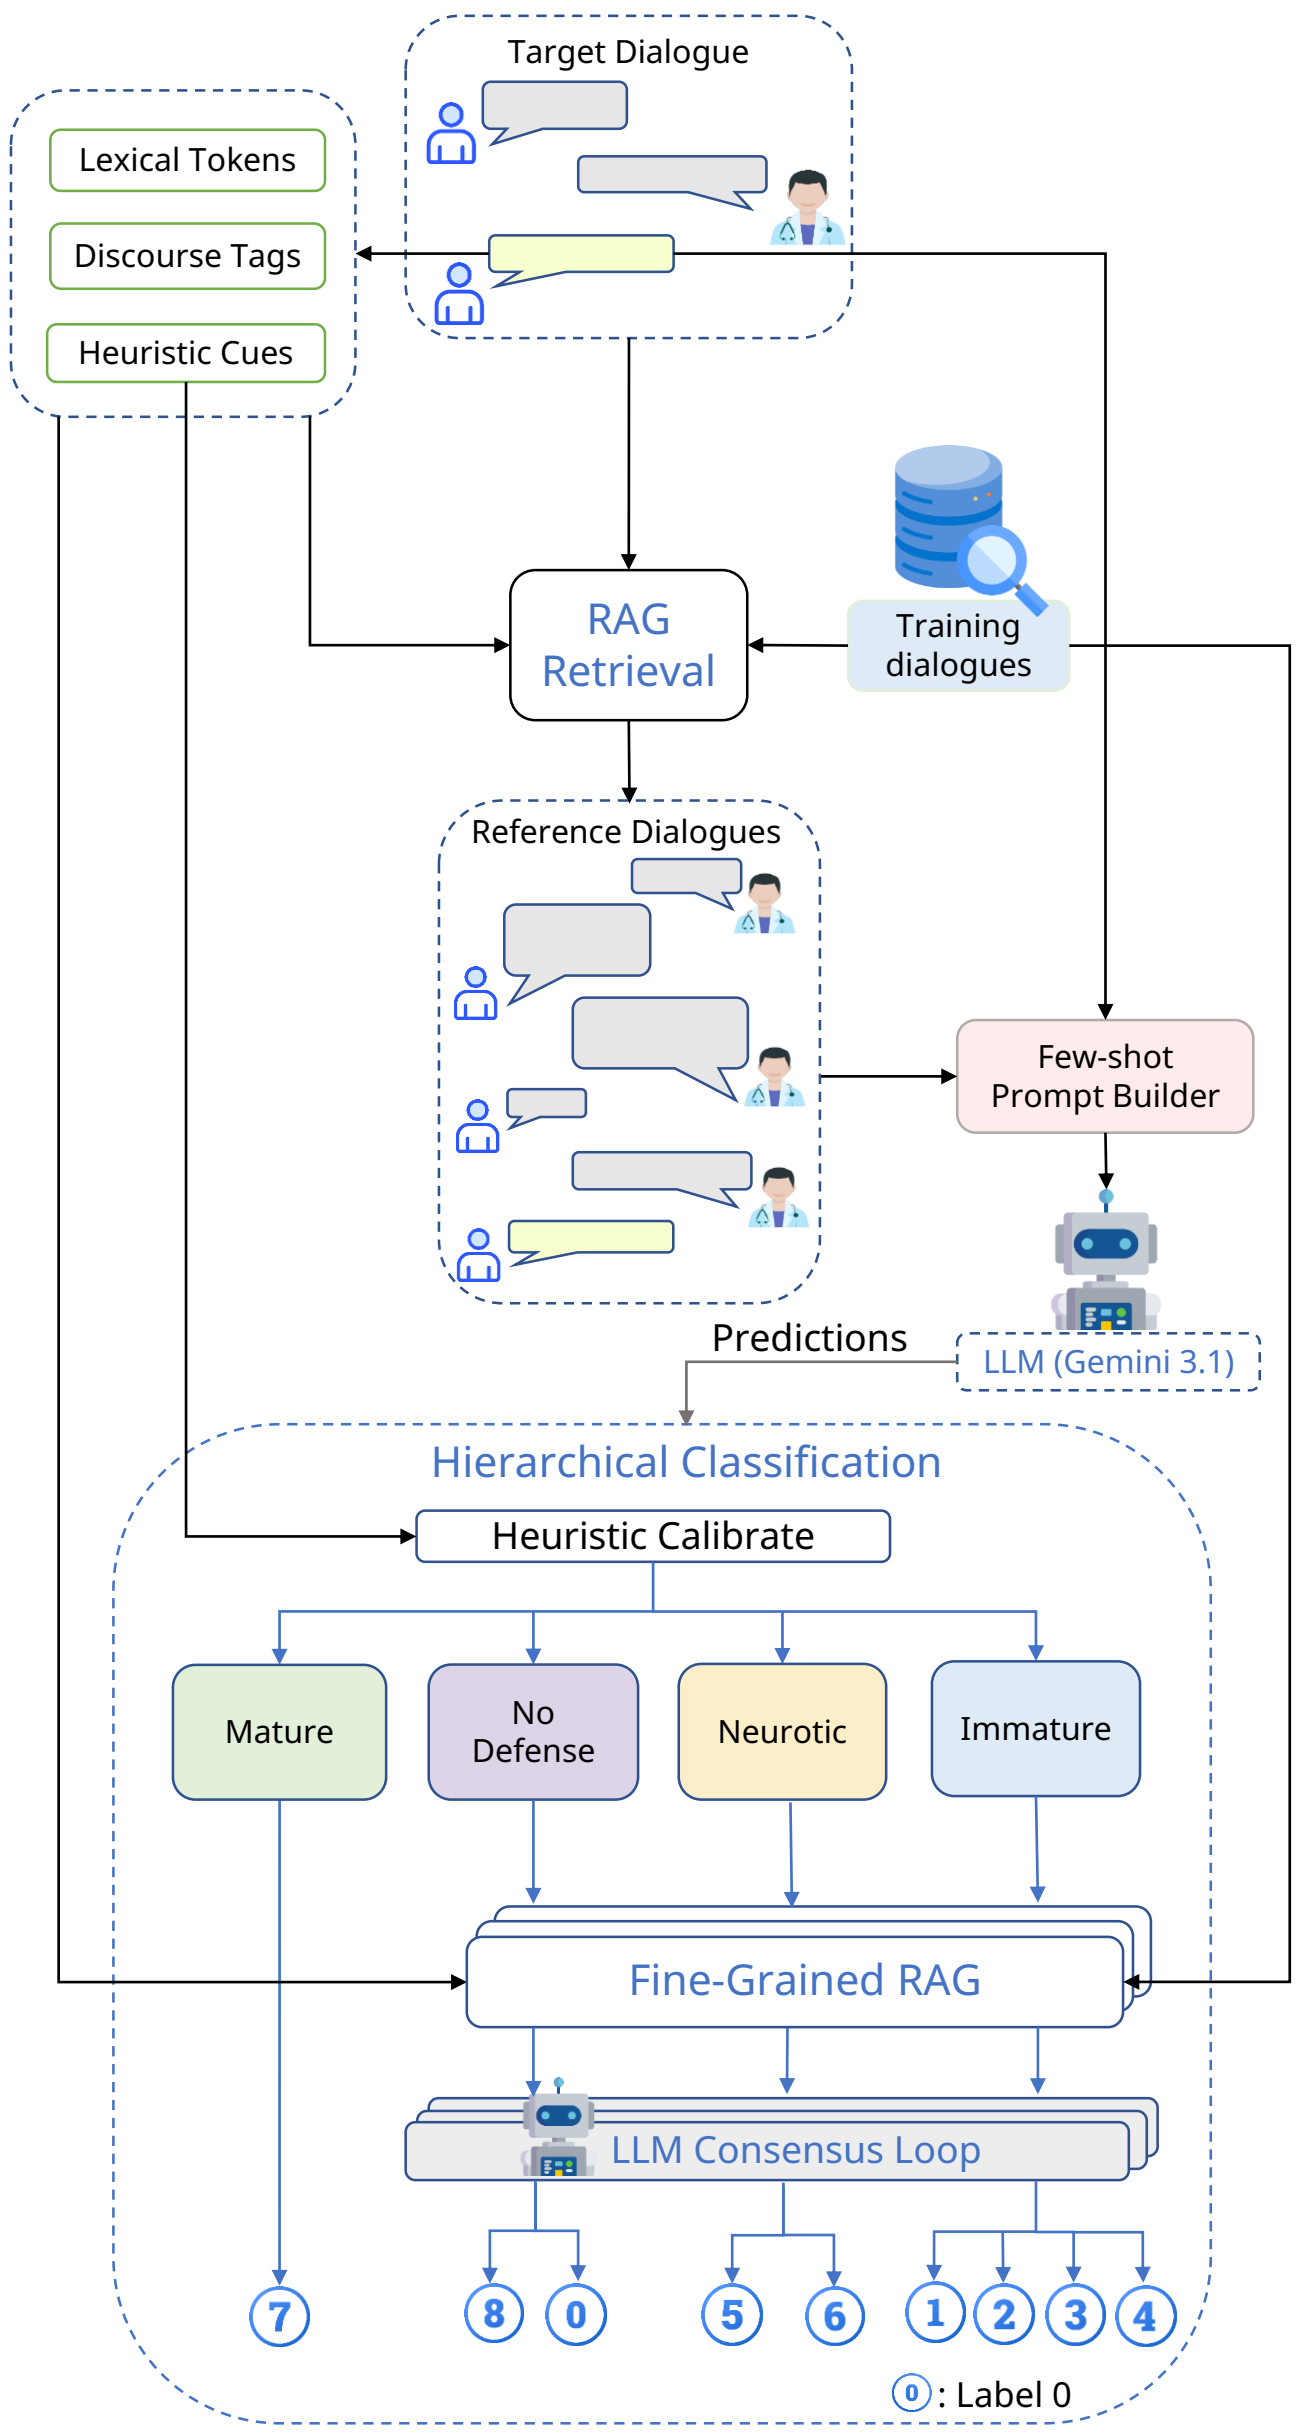

Supplement: SupplementaryMaterial [file app_Ver5.pdf › figures/app_Ver5.pdf]
